# Supplementary material
Source: Research Square preprint supplement (doi:10.21203/rs.3.rs-9425791/v1)
Supplement: Supplementary file 1 [file a33901759ea5b61be7692526.docx]

**Brain Tumor Pathology**

**Supplementary Tables**

Title: Association of nuclear morphometric and texture features derived from routine hematoxylin and eosin slides with molecular alterations in *IDH*-wildtype diffuse gliomas

Authors:

Masamichi Abe1, Takahiro Ono1, Saeko Sudo1, Uran Shimada1, Kota Yazawa1, Yuko Hiroshima2, Hiroshi Nanjo2, Hiroaki Shimizu1,3

Affiliations:

1 Department of Neurosurgery, Akita University Graduate School of Medicine, 1-1-1 Hondo, Akita 010-8543, Japan

2 Department of Surgical Pathology, Akita University Hospital, 44-2 Hasunuma, Hiroomote, Akita 010-8543 Japan

3 Akita Prefectural Hospital Organization and Akita Cerebrospinal and Cardiovascular Center, 6-10 Senshu-kubota-machi, Akita 010-0874 Japan

Corresponding Author:

Takahiro Ono

Address: Department of Neurosurgery, Akita University Graduate School of Medicine, 1-1-1, Hondo, Akita 010-8543, Japan

Phone: +81- 018-884-6140

Fax: +81- 18-836-2616

E-mail: t.ono@med.akita-u.ac.jp

Supplementary Table 1. Results of linear mixed-effects analyses of nuclear morphometric features according to molecular alterations present in at least five cases

|  | event-positive median [IQR] | event-negative median [IQR] | Estimate (95% CI) | p | | q |
| --- | --- | --- | --- | --- | --- | --- |
| TP53 mutation |  |  |  | |  |  |
| nuclear density (nuclei/tile) | 1.01e+03 [839, 1.5e+03] | 1e+03 [564, 1.56e+03] | 49.2 (−316, 415) | | 0.794 | 0.948 |
| total nuclear area fraction | 39.3 [31.9, 66.5] | 37.1 [19, 58.2] | 8.51 (−8.99, 26.0) | | 0.349 | 0.683 |
| mean nuclear area | 0.0440 [0.0330, 0.0540] | 0.0350 [0.0300, 0.0440] | 0.00600 (−0.00114, 0.0131) | | 0.111 | 0.668 |
| circularity | 0.72 [0.689, 0.74] | 0.724 [0.712, 0.744] | −0.0160 (−0.0428, 0.0109) | | 0.254 | 0.678 |
| solidity | 0.883 [0.879, 0.895] | 0.892 [0.884, 0.897] | −0.00553 (−0.0141, 0.00303) | | 0.217 | 0.668 |
| CV | 0.806 [0.741, 0.895] | 0.649 [0.587, 0.677] | 0.208 (0.0783, 0.338) | | <0.01 | 0.2 |
| PTEN mutation |  |  |  | |  |  |
| nuclear density (nuclei/tile) | 1.15e+03 [970, 1.46e+03] | 876 [601, 1.51e+03] | 158 (−218, 534) | | 0.419 | 0.773 |
| total nuclear area fraction | 44.1 [32.6, 68.4] | 37.3 [23.8, 61.3] | 6.84 (−11.5, 25.2) | | 0.471 | 0.838 |
| mean nuclear area | 0.0370 [0.0330, 0.0488] | 0.0375 [0.0312, 0.0478] | 0.000511 (−0.00729, 0.00831) | | 0.899 | 0.948 |
| circularity | 0.717 [0.702, 0.723] | 0.734 [0.711, 0.757] | −0.0223 (−0.0497, 0.00504) | | 0.122 | 0.668 |
| solidity | 0.883 [0.88, 0.889] | 0.893 [0.883, 0.9] | −0.00855 (−0.0171, 0.0000225) | | 0.0614 | 0.668 |
| CV | 0.75 [0.657, 0.87] | 0.669 [0.593, 0.799] | 0.0750 (−0.0812, 0.231) | | 0.355 | 0.683 |
| TERT promoter mutation |  |  |  | |  |  |
| nuclear density (nuclei/tile) | 1.22e+03 [1e+03, 1.59e+03] | 830 [580, 1.5e+03] | 266 (−100, 633) | | 0.167 | 0.668 |
| total nuclear area fraction | 44.1 [37.2, 71.3] | 33.9 [20, 58] | 11.6 (−6.41, 29.6) | | 0.218 | 0.668 |
| mean nuclear area | 0.0405 [0.0322, 0.0520] | 0.0370 [0.0312, 0.0478] | 0.00126 (−0.00653, 0.00905) | | 0.754 | 0.948 |
| circularity | 0.73 [0.707, 0.742] | 0.723 [0.704, 0.74] | −0.00504 (−0.0336, 0.0236) | | 0.733 | 0.948 |
| solidity | 0.893 [0.883, 0.896] | 0.889 [0.88, 0.895] | −0.000278 (−0.00946, 0.00891) | | 0.953 | 0.953 |
| CV | 0.728 [0.671, 0.793] | 0.667 [0.593, 0.849] | −0.0152 (−0.174, 0.144) | | 0.853 | 0.948 |
| PI3K pathway mutation |  |  |  | |  |  |
| nuclear density (nuclei/tile) | 982 [616, 1.65e+03] | 1.01e+03 [740, 1.46e+03] | −105 (−494, 284) | | 0.601 | 0.931 |
| total nuclear area fraction | 34.1 [27, 79.1] | 40.9 [31.6, 58] | −2.10 (−21.1, 16.9) | | 0.83 | 0.948 |
| mean nuclear area | 0.0390 [0.0330, 0.0490] | 0.0370 [0.0315, 0.0470] | 0.000370 (−0.00763, 0.00837) | | 0.929 | 0.948 |
| circularity | 0.721 [0.676, 0.736] | 0.727 [0.711, 0.742] | −0.00488 (−0.0342, 0.0245) | | 0.747 | 0.948 |
| solidity | 0.886 [0.877, 0.895] | 0.891 [0.883, 0.896] | −0.000460 (−0.00988, 0.00896) | | 0.925 | 0.948 |
| CV | 0.669 [0.616, 0.774] | 0.728 [0.616, 0.849] | −0.106 (−0.264, 0.0516) | | 0.199 | 0.668 |
| EGFR amplification |  |  |  | |  |  |
| nuclear density (nuclei/tile) | 1e+03 [770, 1.4e+03] | 1.01e+03 [689, 1.52e+03] | −52.7 (−474, 368) | | 0.808 | 0.948 |
| total nuclear area fraction | 42.4 [30.3, 56.3] | 37.1 [30.9, 66.5] | −2.83 (−23.3, 17.6) | | 0.789 | 0.948 |
| mean nuclear area | 0.0370 [0.0325, 0.0475] | 0.0380 [0.0310, 0.0480] | 0.000533 (−0.00810, 0.00917) | | 0.905 | 0.948 |
| circularity | 0.719 [0.712, 0.731] | 0.725 [0.689, 0.743] | 0.00194 (−0.0298, 0.0337) | | 0.905 | 0.948 |
| solidity | 0.892 [0.884, 0.895] | 0.89 [0.879, 0.896] | 0.00182 (−0.00832, 0.0120) | | 0.728 | 0.948 |
| CV | 0.612 [0.597, 0.699] | 0.741 [0.649, 0.864] | −0.0896 (−0.262, 0.0829) | | 0.318 | 0.683 |
| PDGFRA amplification |  |  |  | |  |  |
| nuclear density (nuclei/tile) | 1.4e+03 [1.07e+03, 1.65e+03] | 936 [674, 1.38e+03] | 433 (21.2, 846) | | 0.0495 | 0.668 |
| total nuclear area fraction | 62.8 [48.5, 76.5] | 36.5 [25.1, 47] | 22.4 (2.60, 42.3) | | 0.0356 | 0.668 |
| mean nuclear area | 0.0455 [0.0353, 0.0525] | 0.0360 [0.0310, 0.0470] | 0.00661 (−0.00214, 0.0154) | | 0.151 | 0.668 |
| circularity | 0.722 [0.712, 0.733] | 0.723 [0.705, 0.741] | −0.0173 (−0.0501, 0.0155) | | 0.312 | 0.683 |
| solidity | 0.893 [0.886, 0.896] | 0.887 [0.881, 0.896] | −0.00337 (−0.0140, 0.00728) | | 0.541 | 0.895 |
| CV | 0.805 [0.668, 0.886] | 0.669 [0.601, 0.764] | 0.119 (−0.0614, 0.298) | | 0.208 | 0.668 |
| CDK4 amplification |  |  |  | |  |  |
| nuclear density (nuclei/tile) | 912 [628, 1.14e+03] | 1.01e+03 [698, 1.51e+03] | −153 (−625, 320) | | 0.533 | 0.895 |
| total nuclear area fraction | 37.1 [30.9, 37.6] | 42.4 [28.4, 70.4] | −11.0 (−33.8, 11.8) | | 0.354 | 0.683 |
| mean nuclear area | 0.0370 [0.0330, 0.0470] | 0.0380 [0.0315, 0.0485] | −0.00182 (−0.0116, 0.00792) | | 0.718 | 0.948 |
| circularity | 0.741 [0.74, 0.747] | 0.719 [0.695, 0.739] | 0.0222 (−0.0126, 0.0570) | | 0.223 | 0.668 |
| solidity | 0.895 [0.895, 0.899] | 0.885 [0.879, 0.894] | 0.00947 (−0.00143, 0.0204) | | 0.1 | 0.668 |
| CV | 0.627 [0.612, 0.667] | 0.741 [0.627, 0.878] | −0.134 (−0.326, 0.0582) | | 0.184 | 0.668 |
| CDKN2A/B homozygous deletion |  |  |  | |  |  |
| nuclear density (nuclei/tile) | 1.34e+03 [1e+03, 1.51e+03] | 960 [610, 1.51e+03] | 246 (−221, 713) | | 0.311 | 0.683 |
| total nuclear area fraction | 42.4 [31.5, 50.6] | 37.6 [27, 64.3] | 1.88 (−21.3, 25.0) | | 0.875 | 0.948 |
| mean nuclear area | 0.0340 [0.0290, 0.0440] | 0.0400 [0.0330, 0.0490] | −0.00620 (−0.0157, 0.00327) | | 0.211 | 0.668 |
| circularity | 0.714 [0.706, 0.743] | 0.724 [0.706, 0.741] | −0.0107 (−0.0463, 0.0250) | | 0.562 | 0.9 |
| solidity | 0.883 [0.883, 0.885] | 0.892 [0.881, 0.896] | −0.00689 (−0.0181, 0.00429) | | 0.238 | 0.672 |
| CV | 0.683 [0.589, 0.741] | 0.682 [0.62, 0.878] | −0.0938 (−0.289, 0.102) | | 0.356 | 0.683 |

Abbreviations: IQR, interquartile range; CI, confidence interval; CV, coefficient of variation of nuclear area. Values in the estimate (95% CI) column are presented as fixed-effect estimates from linear mixed-effects models with corresponding 95% confidence intervals. Molecular events observed in fewer than five cases were excluded from the main inferential analysis and are not shown.
