# Supplementary material
Source: Research Square preprint supplement (doi:10.21203/rs.3.rs-9425791/v1)
Supplement: Supplementary file 2 [file d467f3390e684539b6302b2e.docx]

**Brain Tumor Pathology**

**Supplementary Tables**

Title: Association of nuclear morphometric and texture features derived from routine hematoxylin and eosin slides with molecular alterations in *IDH*-wildtype diffuse gliomas

Authors:

Masamichi Abe1, Takahiro Ono1, Saeko Sudo1, Uran Shimada1, Kota Yazawa1, Yuko Hiroshima2, Hiroshi Nanjo2, Hiroaki Shimizu1,3

Affiliations:

1 Department of Neurosurgery, Akita University Graduate School of Medicine, 1-1-1 Hondo, Akita 010-8543, Japan

2 Department of Surgical Pathology, Akita University Hospital, 44-2 Hasunuma, Hiroomote, Akita 010-8543 Japan

3 Akita Prefectural Hospital Organization and Akita Cerebrospinal and Cardiovascular Center, 6-10 Senshu-kubota-machi, Akita 010-0874 Japan

Corresponding Author:

Takahiro Ono

Address: Department of Neurosurgery, Akita University Graduate School of Medicine, 1-1-1, Hondo, Akita 010-8543, Japan

Phone: +81- 018-884-6140

Fax: +81- 18-836-2616

E-mail: t.ono@med.akita-u.ac.jp

| Supplementary Table 2. Results of linear mixed-effects analyses of texture features according to molecular alterations present in at least five cases | | | | | |
| --- | --- | --- | --- | --- | --- |
|  | event-positive median [IQR] | event-negative median [IQR] | Estimate (95% CI) | p | q |
| TP53 mutation |  |  |  |  |  |
| GLCM_JointEntropyLog2 (IBSI: TU9B) | 8.83 [8.62, 8.93] | 8.7 [8.63, 8.94] | −0.0532 (−0.301, 0.195) | 0.678 | 0.995 |
| GLCM_InverseDifferenceMoment (IBSI: WF0Z) | 0.308 [0.3, 0.38] | 0.301 [0.293, 0.334] | 0.0179 (−0.0201, 0.0560) | 0.364 | 0.995 |
| GLRLM_ShortRunsEmphasis (IBSI: 22OV) | 0.967 [0.96, 0.969] | 0.966 [0.963, 0.968] | −0.00133 (−0.00658, 0.00393) | 0.625 | 0.995 |
| GLRLM_LongRunsEmphasis (IBSI: W4KF) | 1.3 [1.23, 1.35] | 1.29 [1.25, 1.31] | −0.000848 (−0.0826, 0.0809) | 0.984 | 0.995 |
| NGTDM_Coarseness (IBSI: QCDE) | 1.58e−05 [1.17e−05, 2.06e−05] | 1.39e−05 [1.1e−05, 1.58e−05] | 0.00000174 (−0.00000291, 0.00000640) | 0.476 | 0.995 |
| NGTDM_Contrast (IBSI: 65HE) | 0.0914 [0.0808, 0.111] | 0.1 [0.0896, 0.117] | −0.00408 (−0.0231, 0.0150) | 0.679 | 0.995 |
| PTEN mutation |  |  |  |  |  |
| GLCM_JointEntropyLog2 (IBSI: TU9B) | 8.69 [8.66, 8.86] | 8.85 [8.6, 8.98] | −0.0173 (−0.276, 0.241) | 0.897 | 0.995 |
| GLCM_InverseDifferenceMoment (IBSI: WF0Z) | 0.315 [0.301, 0.326] | 0.301 [0.287, 0.371] | 0.000948 (−0.0393, 0.0412) | 0.964 | 0.995 |
| GLRLM_ShortRunsEmphasis (IBSI: 22OV) | 0.966 [0.964, 0.967] | 0.966 [0.96, 0.969] | 0.00117 (−0.00431, 0.00665) | 0.678 | 0.995 |
| GLRLM_LongRunsEmphasis (IBSI: W4KF) | 1.29 [1.24, 1.3] | 1.28 [1.23, 1.34] | −0.0314 (−0.116, 0.0528) | 0.471 | 0.995 |
| NGTDM_Coarseness (IBSI: QCDE) | 1.56e−05 [1.21e−05, 2.22e−05] | 1.42e−05 [1.07e−05, 1.77e−05] | 0.00000291 (−0.00000186, 0.00000768) | 0.253 | 0.995 |
| NGTDM_Contrast (IBSI: 65HE) | 0.0871 [0.0777, 0.0982] | 0.105 [0.0906, 0.119] | −0.0194 (−0.0379, −0.000985) | 0.0491 | 0.393 |
| TERT promoter mutation |  |  |  |  |  |
| GLCM_JointEntropyLog2 (IBSI: TU9B) | 8.69 [8.65, 8.8] | 8.87 [8.59, 8.96] | 0.0395 (−0.219, 0.298) | 0.767 | 0.995 |
| GLCM_InverseDifferenceMoment (IBSI: WF0Z) | 0.318 [0.302, 0.338] | 0.301 [0.295, 0.367] | −0.00552 (−0.0457, 0.0347) | 0.79 | 0.995 |
| GLRLM_ShortRunsEmphasis (IBSI: 22OV) | 0.966 [0.964, 0.969] | 0.966 [0.961, 0.969] | 0.00179 (−0.00366, 0.00725) | 0.525 | 0.995 |
| GLRLM_LongRunsEmphasis (IBSI: W4KF) | 1.27 [1.22, 1.31] | 1.3 [1.25, 1.34] | −0.0492 (−0.132, 0.0337) | 0.255 | 0.995 |
| NGTDM_Coarseness (IBSI: QCDE) | 1.53e−05 [1.2e−05, 2.22e−05] | 1.46e−05 [1.08e−05, 1.77e−05] | 0.00000264 (−0.00000215, 0.00000743) | 0.3 | 0.995 |
| NGTDM_Contrast (IBSI: 65HE) | 0.0879 [0.0777, 0.109] | 0.0999 [0.0903, 0.118] | −0.00674 (−0.0265, 0.0130) | 0.51 | 0.995 |
| PI3K pathway mutation |  |  |  |  |  |
| GLCM_JointEntropyLog2 (IBSI: TU9B) | 8.73 [8.6, 9.02] | 8.76 [8.65, 8.92] | −0.0382 (−0.303, 0.227) | 0.78 | 0.995 |
| GLCM_InverseDifferenceMoment (IBSI: WF0Z) | 0.3 [0.296, 0.357] | 0.313 [0.297, 0.338] | 0.00317 (−0.0381, 0.0445) | 0.882 | 0.995 |
| GLRLM_ShortRunsEmphasis (IBSI: 22OV) | 0.966 [0.959, 0.968] | 0.966 [0.963, 0.969] | −0.00239 (−0.00795, 0.00318) | 0.408 | 0.995 |
| GLRLM_LongRunsEmphasis (IBSI: W4KF) | 1.28 [1.25, 1.34] | 1.29 [1.23, 1.31] | 0.0466 (−0.0388, 0.132) | 0.295 | 0.995 |
| NGTDM_Coarseness (IBSI: QCDE) | 1.43e−05 [1.08e−05, 2.13e−05] | 1.47e−05 [1.2e−05, 1.87e−05] | −0.00000188 (−0.00000685, 0.00000309) | 0.472 | 0.995 |
| NGTDM_Contrast (IBSI: 65HE) | 0.0966 [0.0866, 0.106] | 0.096 [0.0833, 0.117] | 0.00147 (−0.0190, 0.0219) | 0.889 | 0.995 |
| EGFR amplification |  |  |  |  |  |
| GLCM_JointEntropyLog2 (IBSI: TU9B) | 8.68 [8.66, 8.86] | 8.77 [8.61, 8.97] | −0.0280 (−0.314, 0.258) | 0.85 | 0.995 |
| GLCM_InverseDifferenceMoment (IBSI: WF0Z) | 0.322 [0.297, 0.334] | 0.304 [0.295, 0.371] | −0.00255 (−0.0471, 0.0420) | 0.912 | 0.995 |
| GLRLM_ShortRunsEmphasis (IBSI: 22OV) | 0.965 [0.963, 0.966] | 0.967 [0.96, 0.969] | −0.0000927 (−0.00618, 0.00599) | 0.976 | 0.995 |
| GLRLM_LongRunsEmphasis (IBSI: W4KF) | 1.29 [1.27, 1.3] | 1.26 [1.23, 1.35] | −0.0151 (−0.109, 0.0789) | 0.755 | 0.995 |
| NGTDM_Coarseness (IBSI: QCDE) | 1.42e−05 [1.22e−05, 1.53e−05] | 1.54e−05 [1.04e−05, 2.06e−05] | −0.000000338 (−0.00000576, 0.00000508) | 0.905 | 0.995 |
| NGTDM_Contrast (IBSI: 65HE) | 0.104 [0.0851, 0.111] | 0.0931 [0.0854, 0.119] | −0.00306 (−0.0251, 0.0189) | 0.787 | 0.995 |
| PDGFRA amplification |  |  |  |  |  |
| GLCM_JointEntropyLog2 (IBSI: TU9B) | 8.57 [8.35, 8.7] | 8.85 [8.65, 8.98] | −0.378 (−0.643, −0.113) | <0.01 | 0.115 |
| GLCM_InverseDifferenceMoment (IBSI: WF0Z) | 0.38 [0.373, 0.39] | 0.3 [0.292, 0.321] | 0.0761 (0.0393, 0.113) | <0.001 | 0.0194 |
| GLRLM_ShortRunsEmphasis (IBSI: 22OV) | 0.959 [0.958, 0.96] | 0.967 [0.965, 0.969] | −0.00894 (−0.0144, −0.00352) | <0.01 | 0.0794 |
| GLRLM_LongRunsEmphasis (IBSI: W4KF) | 1.35 [1.35, 1.39] | 1.26 [1.23, 1.3] | 0.0877 (−0.00577, 0.181) | 0.0774 | 0.531 |
| NGTDM_Coarseness (IBSI: QCDE) | 2.07e−05 [1.89e−05, 2.65e−05] | 1.34e−05 [1.04e−05, 1.58e−05] | 0.00000788 (0.00000303, 0.0000127) | <0.01 | 0.115 |
| NGTDM_Contrast (IBSI: 65HE) | 0.0785 [0.0694, 0.0888] | 0.105 [0.09, 0.119] | −0.0273 (−0.0481, −0.00659) | 0.0158 | 0.151 |
| CDK4 amplification |  |  |  |  |  |
| GLCM_JointEntropyLog2 (IBSI: TU9B) | 8.83 [8.61, 8.9] | 8.7 [8.64, 8.95] | 0.0290 (−0.295, 0.353) | 0.862 | 0.995 |
| GLCM_InverseDifferenceMoment (IBSI: WF0Z) | 0.301 [0.296, 0.315] | 0.308 [0.297, 0.35] | −0.00900 (−0.0593, 0.0412) | 0.728 | 0.995 |
| GLRLM_ShortRunsEmphasis (IBSI: 22OV) | 0.967 [0.966, 0.969] | 0.966 [0.962, 0.968] | 0.00132 (−0.00554, 0.00818) | 0.709 | 0.995 |
| GLRLM_LongRunsEmphasis (IBSI: W4KF) | 1.24 [1.23, 1.26] | 1.3 [1.24, 1.33] | −0.0103 (−0.117, 0.0961) | 0.851 | 0.995 |
| NGTDM_Coarseness (IBSI: QCDE) | 1.29e−05 [1.28e−05, 1.54e−05] | 1.49e−05 [1.05e−05, 2.07e−05] | 0.0000000219 (−0.00000611, 0.00000615) | 0.995 | 0.995 |
| NGTDM_Contrast (IBSI: 65HE) | 0.0996 [0.0904, 0.104] | 0.0931 [0.0834, 0.118] | 0.00216 (−0.0227, 0.0271) | 0.866 | 0.995 |
| CDKN2A/B homozygous deletion |  |  |  |  |  |
| GLCM_JointEntropyLog2 (IBSI: TU9B) | 8.65 [8.62, 8.7] | 8.83 [8.63, 8.95] | −0.179 (−0.495, 0.138) | 0.278 | 0.995 |
| GLCM_InverseDifferenceMoment (IBSI: WF0Z) | 0.322 [0.308, 0.325] | 0.301 [0.295, 0.35] | 0.0124 (−0.0378, 0.0625) | 0.633 | 0.995 |
| GLRLM_ShortRunsEmphasis (IBSI: 22OV) | 0.966 [0.965, 0.966] | 0.967 [0.962, 0.969] | −0.00253 (−0.00934, 0.00427) | 0.472 | 0.995 |
| GLRLM_LongRunsEmphasis (IBSI: W4KF) | 1.3 [1.29, 1.32] | 1.26 [1.23, 1.32] | −0.00701 (−0.113, 0.0994) | 0.898 | 0.995 |
| NGTDM_Coarseness (IBSI: QCDE) | 1.42e−05 [1.04e−05, 1.62e−05] | 1.49e−05 [1.15e−05, 2e−05] | −0.00000208 (−0.00000816, 0.00000399) | 0.514 | 0.995 |
| NGTDM_Contrast (IBSI: 65HE) | 0.0888 [0.0815, 0.111] | 0.0996 [0.0876, 0.117] | −0.00813 (−0.0329, 0.0166) | 0.525 | 0.995 |

Abbreviations: IQR, interquartile range; CI, confidence interval; GLCM, gray-level co-occurrence matrix; GLRLM, gray-level run length matrix; NGTDM, neighborhood gray-tone difference matrix; IBSI, Image Biomarker Standardization Initiative. Values in the estimate (95% CI) column are presented as fixed-effect estimates from linear mixed-effects models with corresponding 95% confidence intervals. Molecular events observed in fewer than five cases were excluded from the main inferential analysis and are not shown.
